# Supplementary material for: Two 2D → 3D entangled coordination polymers with polycatenated and polythreaded features based on 44-sql layers
Source: Royal Society of Chemistry journal article supplement (doi:10.1039/c2ce06593b), 2012-01-01
Supplement: c2ce06593b.pdf [file c2ce06593b.pdf]

## Electronic Supplementary Information (ESI)

### **Two 2D → 3D entangled coordination polymers with polycatenated and polythreaded features based on 4<sup>4</sup>-sql layers**

**Xinxin Xu<sup>†</sup>, Xia Zhang<sup>†</sup>, Xiaoxia Liu<sup>†\*</sup>, Linshan Wang<sup>†</sup>, Enbo Wang<sup>‡</sup>**

*<sup>†</sup>Department of Chemistry, College of Science, Northeast University, Shenyang, Liaoning, 110004, People's Republic of China*

*<sup>‡</sup>Key Laboratory of Polyoxometalate Science of Ministry of Education, Department of Chemistry, Northeast Normal University, Changchun 130024, P. R. China*

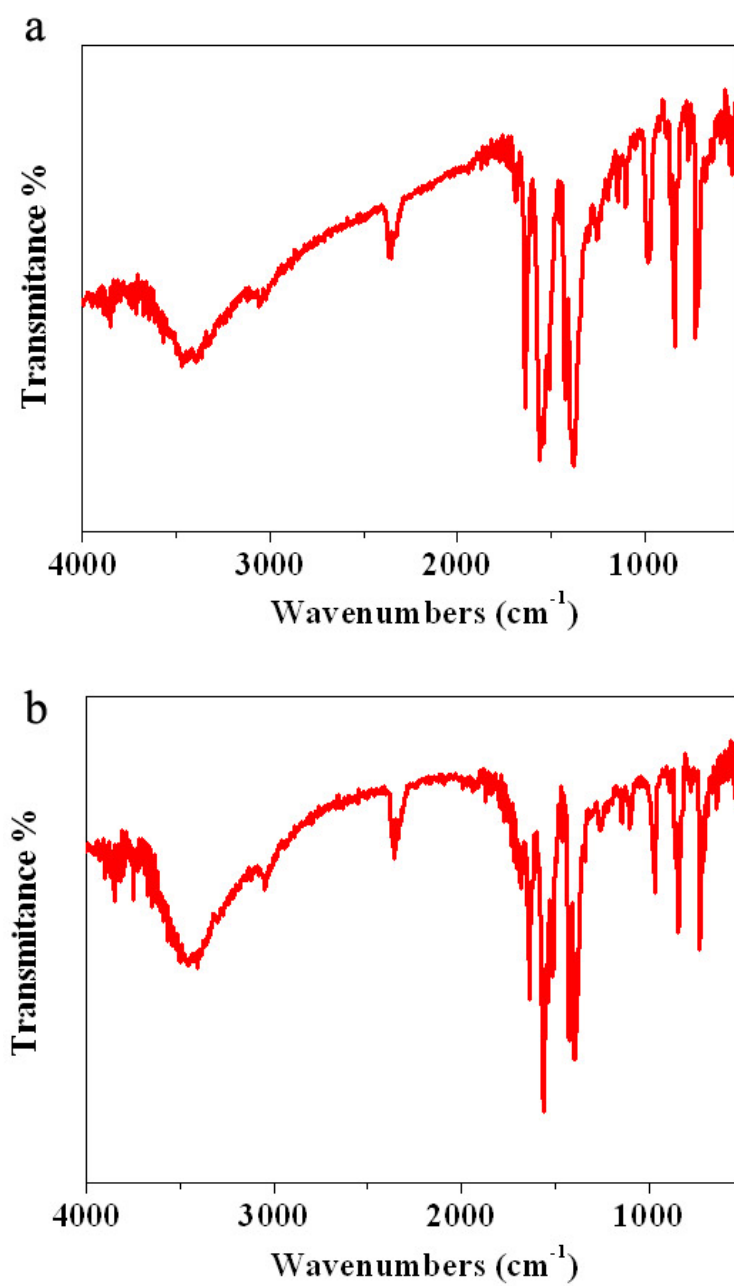

**Figure S1** IR spectra: (a) for **1**; (b) for **2**

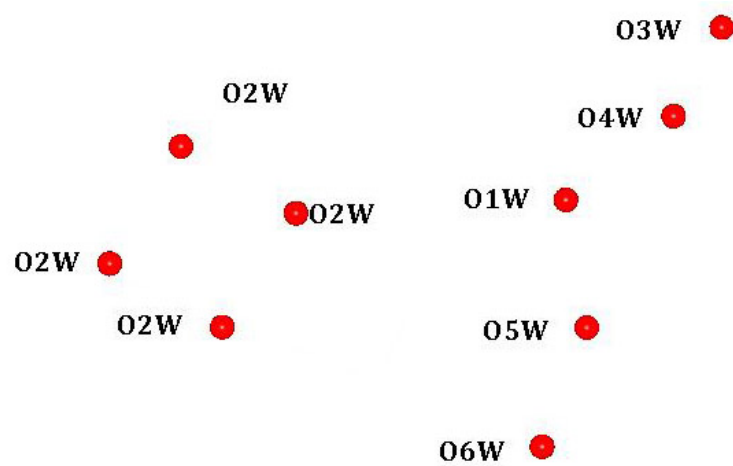

**Figure S2** Two types of water clusters in **1**

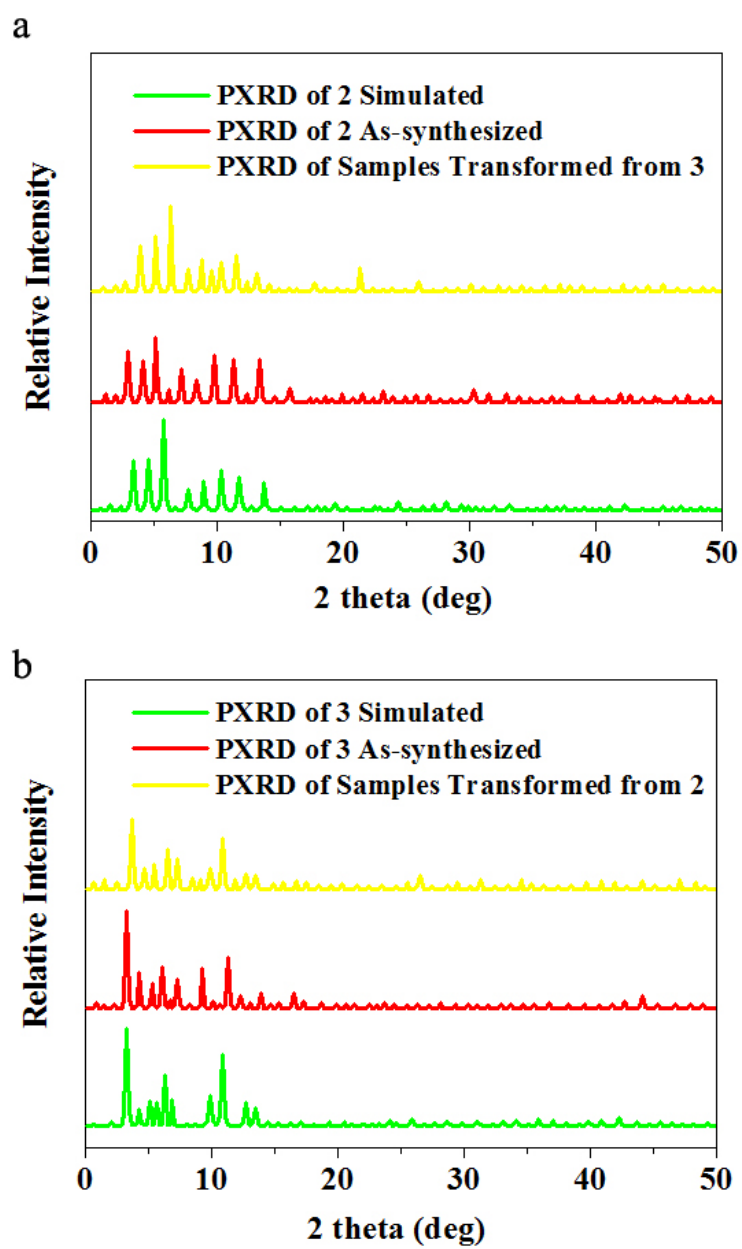

Figure S3 PXRD patterns: (a) for 2; (b) for 3

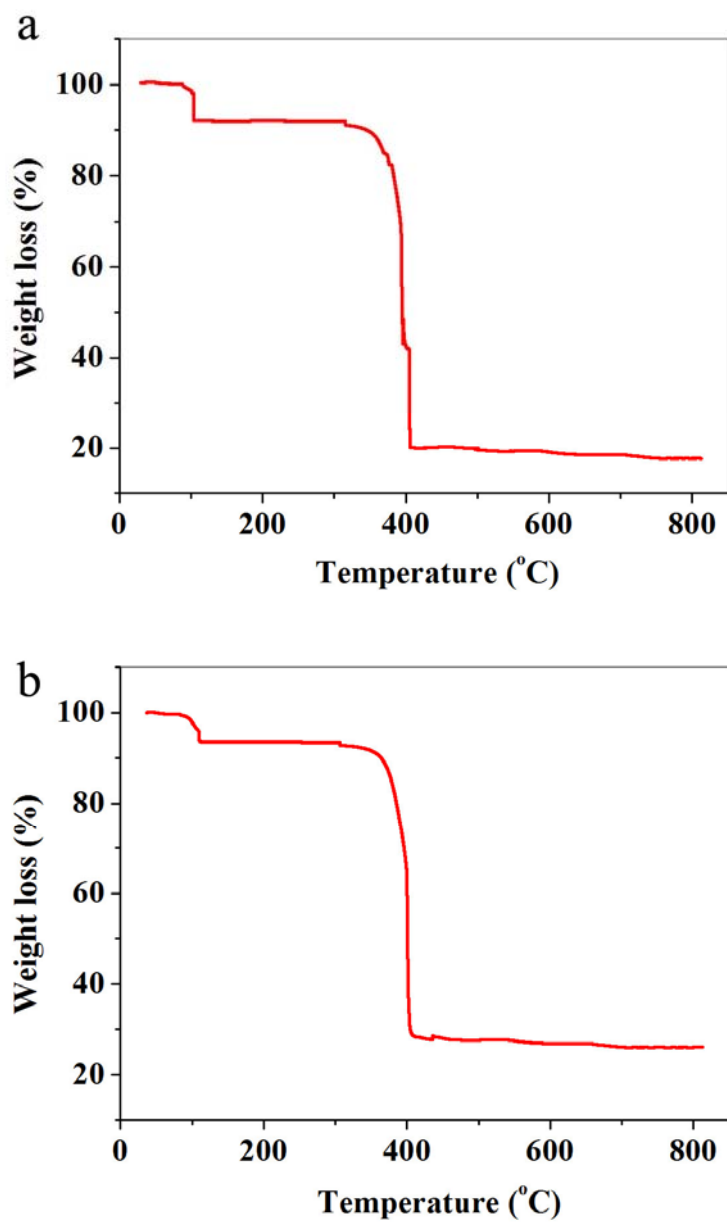

Figure S4 TGA curve from 30 to 800°C: (a) for **1**; (b) for **2**

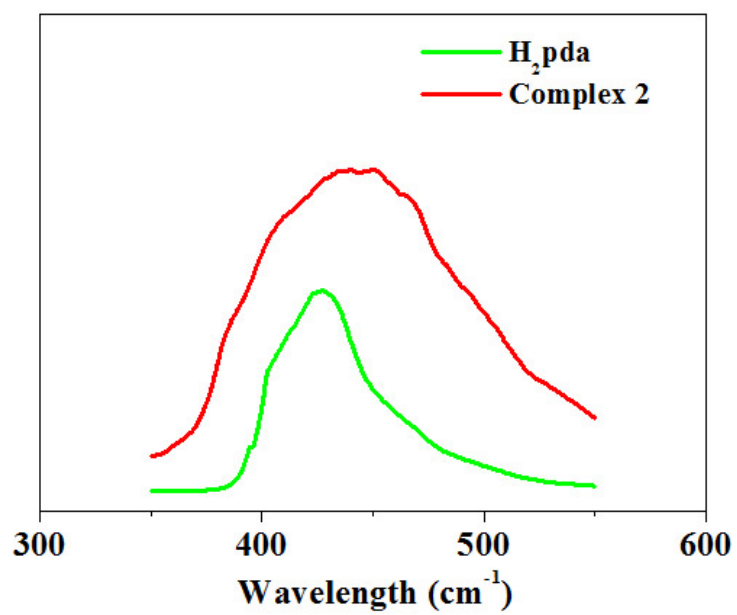

**Figure S5** The fluorescence properties of H<sub>2</sub>pda and **2**.
